# Supplementary material
Source: publisher figshare collection journal article supplement (https://acs.figshare.com/ndownloader/files/3771292)
Supplement: Supplementary file 1 [file 3771292]

## **Effects of Immersion Solvent on Photovoltaic and Photophysical Properties of Porphyrin-Sensitized Solar Cells**

Hironobu Hayashi,<sup>||</sup> Tomohiro Higashino,<sup>||</sup> Yuriko Kinjo,<sup>||</sup> Yamato Fujimori,<sup>||</sup> Kei Kurotobi,<sup>†</sup> Pavel Chabera,<sup>\$</sup> Villy Sundström,<sup>\*, \$</sup> Seiji Isoda,<sup>†</sup> and Hiroshi Imahori<sup>\*, ||, †</sup>

<sup>||</sup>Department of Molecular Engineering, Graduate School of Engineering, Kyoto University, Nishikyo-ku, Kyoto 615-8510, Japan

<sup>†</sup>Institute for Integrated Cell-Material Sciences (WPI-iCeMS), Kyoto University, Nishikyo-ku, Kyoto 615-8510, Japan

<sup>\$</sup>Department of Chemical Physics, Lund University, Box 124, 22100 Lund, Sweden

E-mail: imahori@scl.kyoto-u.ac.jp; villy.sundstrom@chemphys.lu.se

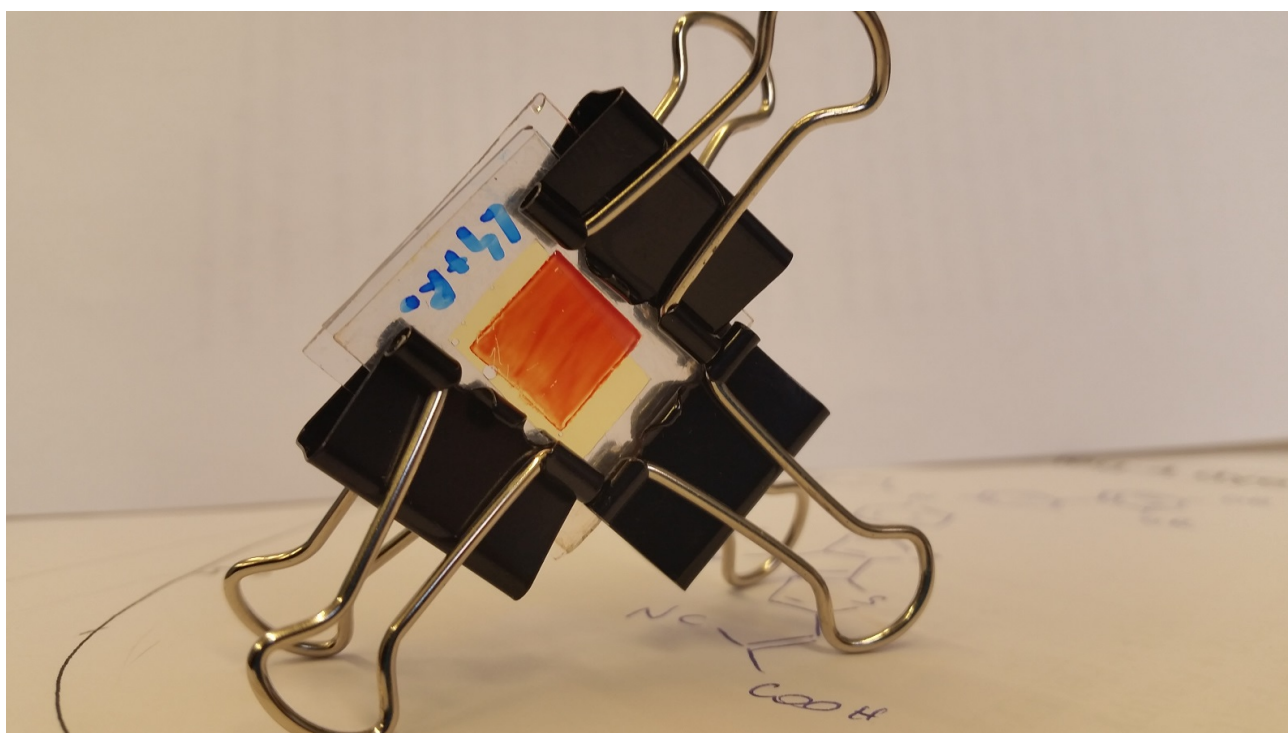

**Figure S1.** A picture of typical sample assembly for TA measurements.
